# Supplementary material for: Atomically-defined model catalysts in ultrahigh vacuum and in liquid electrolytes: particle size-dependent CO adsorption on Pt nanoparticles on ordered Co3O4(111) films
Source: Royal Society of Chemistry journal article supplement (doi:10.1039/c8cp03770a), 2018-01-01
Supplement: c8cp03770a1.pdf [file c8cp03770a1.pdf]

**Atomically-Defined Model Catalysts in  
Ultrahigh Vacuum and in Liquid Electrolytes:  
Particle Size-Dependent CO Adsorption on  
Pt Nanoparticles on Ordered Co<sub>3</sub>O<sub>4</sub>(111) Films**

Firas Faisal<sup>1</sup>, Corinna Stumm<sup>1</sup>, Manon Bertram<sup>1</sup>, Tobias Wähler<sup>1</sup>, Ralf Schuster<sup>1</sup>, Feifei Xiang<sup>2</sup>,  
Ole Lytken<sup>1</sup>, Ioannis Katsounaros<sup>3</sup>, Karl J.J. Mayrhofer<sup>3</sup>, M. Alexander Schneider<sup>2</sup>, Olaf  
Brummel<sup>1\*</sup>, Jörg Libuda<sup>1,4</sup>

<sup>1</sup> *Lehrstuhl für Physikalische Chemie II, Friedrich-Alexander-Universität Erlangen-Nürnberg,  
Egerlandstraße 3, D-91058 Erlangen, Germany*

<sup>2</sup> *Lehrstuhl für Festkörperphysik, Friedrich-Alexander-Universität Erlangen-Nürnberg, Staudtstr 7, D-  
91058 Erlangen, Germany*

<sup>3</sup> *Helmholtz-Institute Erlangen-Nürnberg for Renewable Energy (IEK-11), Forschungszentrum Jülich  
GmbH, Erlangen, 91058, Germany*

<sup>4</sup> *Erlangen Catalysis Resource Center, Friedrich-Alexander-Universität Erlangen-Nürnberg,  
Egerlandstraße 3, D-91058 Erlangen, Germany*

\* corresponding author: Olaf Brummel, olaf.brummel@fau.de

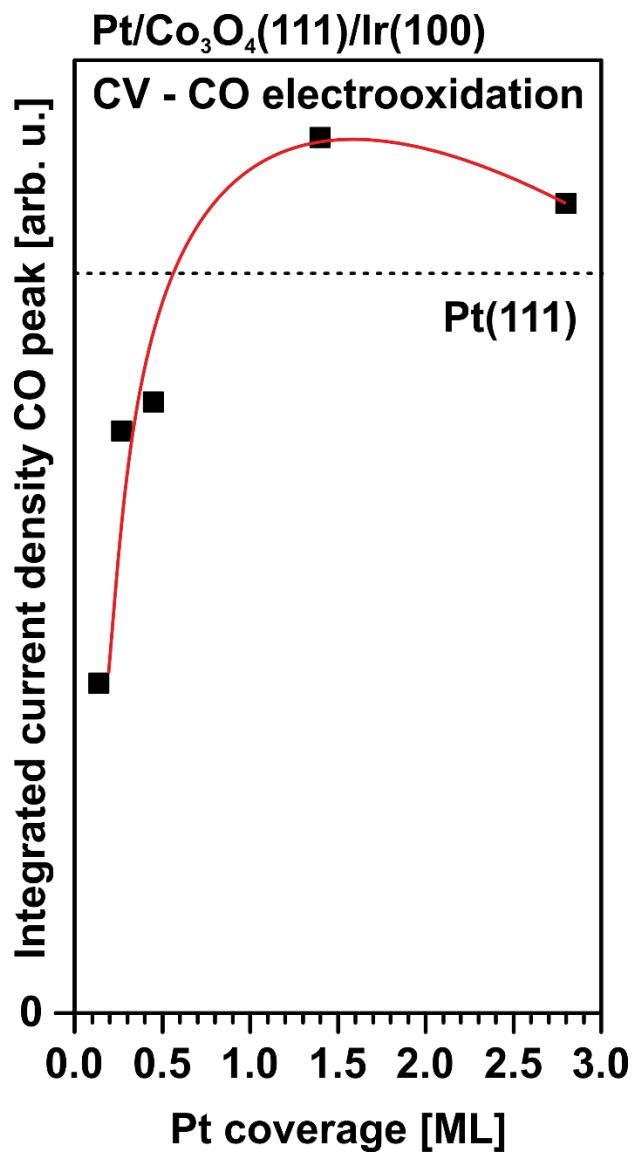

**Figure SI 1:** Integrated current density of the CO oxidation derived from the CO stripping experiment shown in Figure 4 as a function of the Pt loading. The CO peak was integrated using a linear background.

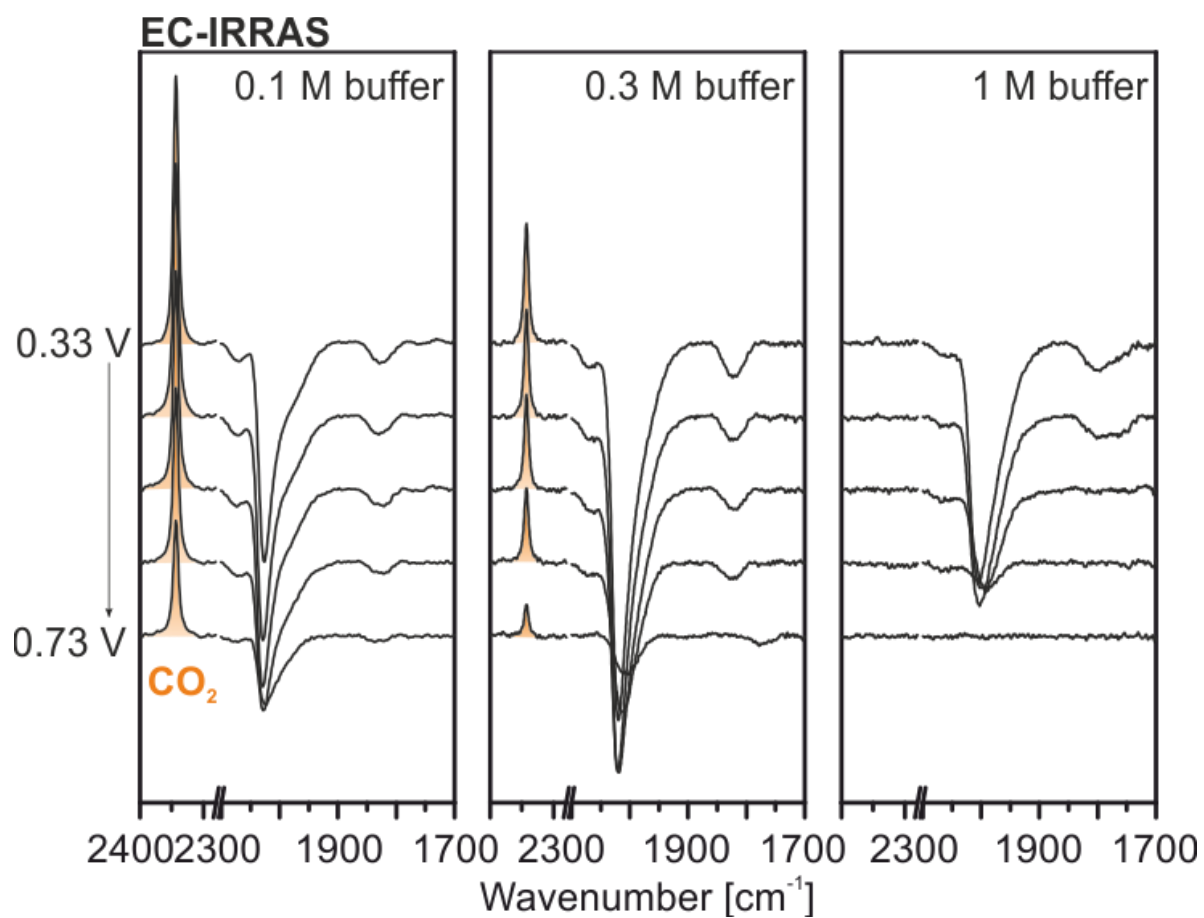

**Figure SI 2:** Potential-dependent EC-IRRAS spectra of CO adsorbed on Pt/Co<sub>3</sub>O<sub>4</sub>(111) using phosphate buffer concentrations of a) 0.1 M, b) 0.3 M and c) 1 M at pH 10. The spectra are referenced against 0.83 V<sub>RHE</sub>.

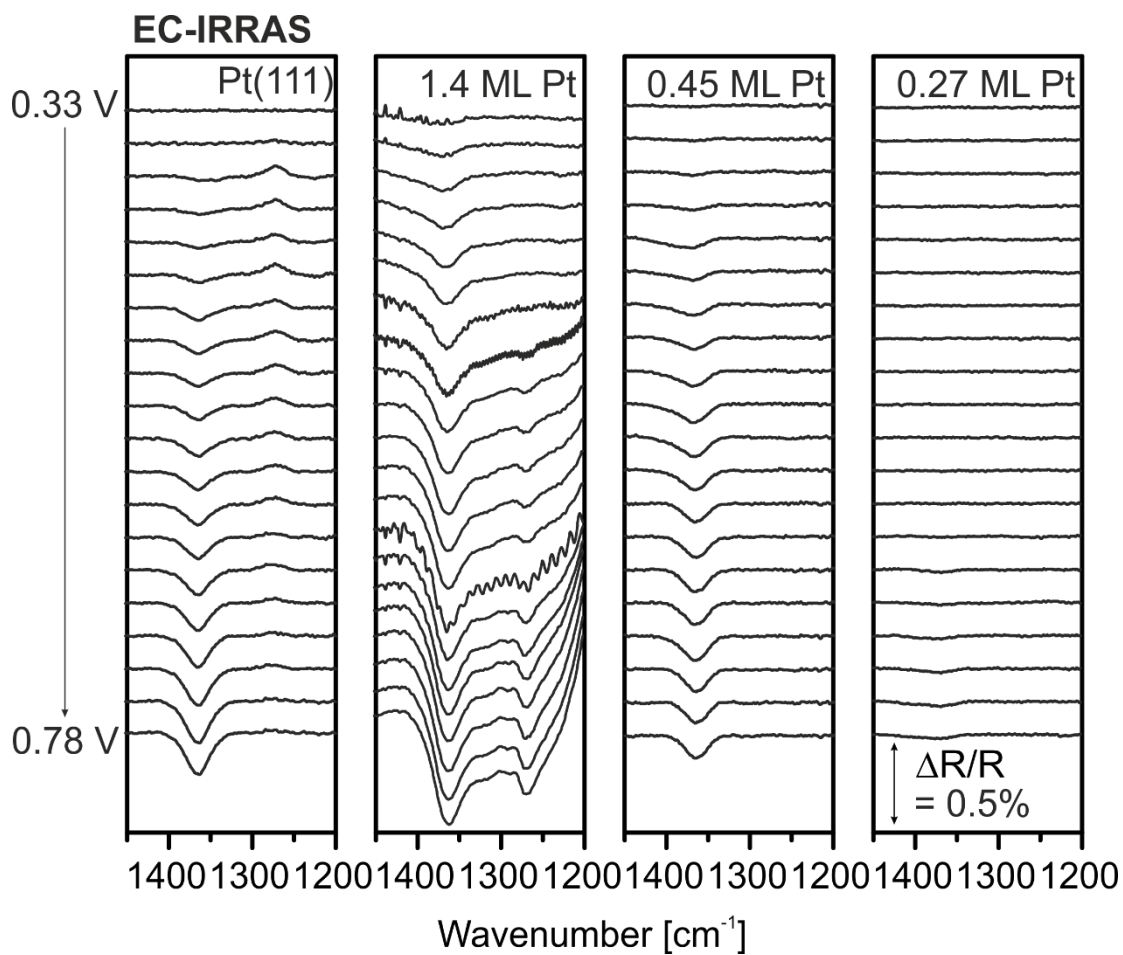

**Figure SI 3:** Carbonate region of the potential-dependent EC-IRRAS spectra of CO adsorbed on a) Pt(111), b) 1.4 ML Pt eq./ $\text{Co}_3\text{O}_4$ , c) 0.45 ML Pt eq./ $\text{Co}_3\text{O}_4$  and d) 0.27 ML Pt eq./ $\text{Co}_3\text{O}_4$ . The spectra are referenced against  $0.805 \text{ V}_{\text{RHE}}$ .
